# Supplementary material for: Why we need to report more than 'Data were Analyzed by t-tests or ANOVA'
Source: eLife. 2018 Dec 21;7:e36163. doi: 10.7554/eLife.36163 (PMC6326723; doi:10.7554/eLife.36163)
Supplement: Figure 1—source data 1. [file elife-36163-fig1-data1.xlsx]

## Sheet: Data
First_Author	first_page	Journal	DOI	Excluded	Exclude Reason	includes_ANOVA	ANOVA_names_factors	specifies_BTW_WIN_Ss_fact	RM_ANOVA	ANOVA_posthoc_specified	ANOVA_max_n_factors	Oneway_instead_of_multiway	Oneway_Fig_table	ANOVA_Report_Fstat	ANOVA_Report _DF	ANOVA_Report_p	RMANOVA_needed_not_reported	RM_Needed_fig_table	complex_ANOVA	n_factor_not_reported_for_all	include_ ANOVA_or_ttest	includes_ANOVA_and_ttest	includes_ttest	specified_paired_unpaired_ttest	specifies_equ_unequ_var	specified_students	identify_data_analyzed_by_t-test	reports_t_statistic	ttest_DF_or_n	ttest_exact_p
Wang C	1709	Cellular Physiology & Biochemistry	10.1159/000471861	no		no															yes	no	yes	no	yes	yes	yes	no	yes	no
Wang F	1725	Cellular Physiology & Biochemistry	10.1159/000471865	no		yes	no	no	no	no	1	yes	Fig 4C	no	no	no	no		no	no	yes	yes	yes	no	yes	yes	yes	no	yes	no
Ornellas F	1736	Cellular Physiology & Biochemistry	10.1159/000471866	no		yes	no	no	no	yes	1	no		no	no	no	no		no	no	yes	no	no
Song B	1753	Cellular Physiology & Biochemistry	10.1159/000471868	no		no															no	no	no
Han B	1766	Cellular Physiology & Biochemistry	10.1159/000471869	no		yes	sometimes	no	yes	yes	1	exclude	Fig 2	yes	no	sometimes	no		no	not for RM ANOVA	yes	yes	yes	no	yes	yes	yes	yes	yes	no
Zhang Z	1777	Cellular Physiology & Biochemistry	10.1159/000471870	no		yes	no	no	no	yes	1	no		no	no	no	no		no	no	yes	no	no
Yu N	1788	Cellular Physiology & Biochemistry	10.1159/000471911	no		yes	no	no	no	yes	1	yes	Fig, 2, 3, 4	no	no	no	no		no	no	yes	no	no
Sinva-Filho A	1801	Cellular Physiology & Biochemistry	10.1159/000471912	yes	review
Shen S	1830	Cellular Physiology & Biochemistry	10.1159/000471913	yes	review
Ma S	1838	Cellular Physiology & Biochemistry	10.1159/000471932	no		yes	yes	no	no	yes	2	no		no	no	no	yes	Fig 1	no	no	yes	no	no
Huang	1851	Cellular Physiology & Biochemistry	10.1159/000471933	no		yes	no	no	no	no	1	no		no	no	no	no		no	no	yes	yes	yes	no	yes	yes	yes	no	yes	no
Sasamoto T	1865	Cellular Physiology & Biochemistry	10.1159/000471934	no		no															yes	no	yes	no	yes	yes	yes	no	yes	no
Wang G	1881	Cellular Physiology & Biochemistry	10.1159/000471935	no		yes	yes	no	no	no	1	no		no	no	no	no		no	no	yes	yes	yes	no	yes	yes	yes	no	yes	yes
Samuel S	1894	Cellular Physiology & Biochemistry	10.1159/00047193	no		yes	no	no	yes	yes	2	no		no	no	no	no		no	no	yes	yes	yes	no	yes	yes	yes	no	yes	no
Liao J	1905	Cellular Physiology & Biochemistry	10.1159/00047194	no		yes	no	no	no	no	1	yes	Fig 7a	no	no	no	no		no	no	yes	no	no
Watari A	1924	Cellular Physiology & Biochemistry	10.1159/00047236	no		no															no	no	no
Fan L	1935	Cellular Physiology & Biochemistry	10.1159/000472380	no		yes	no	no	no	yes	1	yes	Fig 4a, b	no	no	no	yes	Fig 7b, c - likely final time point only in analysis	no	no	yes	no	no
Wu X	1947	Cellular Physiology & Biochemistry	10.1159/000472407	no		no															yes	no	yes	no	no	no	yes	no	yes	no
Zhang J	1957	Cellular Physiology & Biochemistry	10.1159/000472409	no		yes	no	no	no	yes	1	no		no	no	no	no		no	no	yes	no	no
Yu F	1970	Cellular Physiology & Biochemistry	10.1159/000472410	no		yes	no	no	no	no	1	no		no	no	no	no		no	no	yes	yes	yes	no	yes	yes	yes	no	yes	no
Liu L	1981	Cellular Physiology & Biochemistry	10.1159/000475277	no		yes	no	no	no	no	not specified	unknown		no	no	no	no		no		yes	yes	yes	no	yes	yes	no
Al-Rashed F	1993	Cellular Physiology & Biochemistry	10.1159/000475298	no		yes	yes	no	no	yes	1	no		no	no	sometimes	no		no	no	yes	yes	yes	yes	yes	yes	no
Dong Z	2004	Cellular Physiology & Biochemistry	10.1159/000475396	no		yes	no	no	no	no	1	no		no	no	no	no		no	no	yes	yes	yes	yes	yes	yes	yes	no	yes	no
Li Q	2016	Cellular Physiology & Biochemistry	10.1159/000475432	no		yes	no	no	no	yes	1	yes	Fig 4	no	no	no	no		no	no	yes	no	no
Li L	2027	Cellular Physiology & Biochemistry	10.1159/000475433	no		yes	no	no	yes	no	2	no		no	no	no	no		no	no	yes	no	no
Liu Y	2037	Cellular Physiology & Biochemistry	10.1159/000475434	no		no															yes	no	yes	yes	no	no	yes	no	yes	no
Li W	2045	Cellular Physiology & Biochemistry	10.1159/000475435	no		no															no	no	no
So E	2053	Cellular Physiology & Biochemistry	10.1159/000475436	no		yes	no	no	no	yes	1	yes		no	no	no	yes		no	no	yes	yes	yes	no	no	no	yes	no	yes	no
Kang X	2067	Cellular Physiology & Biochemistry	10.1159/000475438	no		yes	no	no	no	no	2	no		no	no	no	no		no	no	yes	no	no
Lan X	2077	Cellular Physiology & Biochemistry	10.1159/000475439	no		yes	yes	no	no	no	1	yes		no	no	sometimes	yes		no	no	yes	yes	yes	yes	no	no	yes	no	yes	sometimes
Peng Y	2091	Cellular Physiology & Biochemistry	10.1159/000475444	no		yes	no	no	no	yes	1	yes	Fig 1a	no	no	no	no		no	no	yes	yes	yes	no	yes	yes	no
Yang W	2104	Cellular Physiology & Biochemistry	10.1159/000475449	no		yes	no	no	no	yes	not specified	unknown		no	no	no	no		no		yes	no	no
Liang H	2117	Cellular Physiology & Biochemistry	10.1159/000475454	no		no															yes	no	yes	yes	yes	yes	yes	no	yes	no
Gowert N	2133	Cellular Physiology & Biochemistry	10.1159/000475566	no		yes	no	no	no	no	1	yes	Fig 3i	no	no	no	no		no	no	yes	yes	yes	yes	no unpaired tests		yes	no	sometimes	no
Jin P	2150	Cellular Physiology & Biochemistry	10.1159/000475569	no		no															no	no	no
Zou L	2161	Cellular Physiology & Biochemistry	10.1159/000475570	no		yes	no	no	no	yes	2	no		no	no	no	no		no	no	yes	yes	yes	no	no	no	yes	no	yes	yes
Deng H	2171	Cellular Physiology & Biochemistry	10.1159/000475571	no		yes	no	no	no	yes	1	yes	Fig 5b, c	no	no	no	no		no	no	yes	yes	yes	no	sometimes	sometimes	yes	no	yes	no
Deng H	2183	Cellular Physiology & Biochemistry	10.1159/00047557	no		yes	no	no	no	yes	1	no		no	no	no	no		no	no	yes	yes	yes	no	no	no	yes	no	no	yes
Lopes-Pacheco M	2194	Cellular Physiology & Biochemistry	10.1159/000475578	no		yes	sometimes	no	no	yes	1	yes	Fig 2	no	no	no	no		no	no	yes	yes	yes	yes	yes	yes	yes	no	yes	no
Li	2211	Cellular Physiology & Biochemistry	10.1159/000475636	no		yes	no	no	no	no	1	yes	Fig 3d	no	no	no	no		no	no	yes	no	no
Wang H	2221	Cellular Physiology & Biochemistry	10.1159/000475637	no		yes	no	no	no	no	1	yes	Fig 3b	no	no	no	yes	Fig 3b	no	no	yes	yes	yes	no	yes	yes	yes	no	sometimes	no
Hou L	2230	Cellular Physiology & Biochemistry	10.1159/000475638	no		yes	no	no	no	yes	not specified	unknown		no	no	no	yes	Fig 1	no		yes	yes	yes	no	yes	yes	yes	no	yes	no
Wu T	2242	Cellular Physiology & Biochemistry	10.1159/000475639	no		yes	yes	no	no	yes	1	no		no	no	no	no		no	no	yes	no	no
Zhang M	2255	Cellular Physiology & Biochemistry	10.1159/000475640	no		no															yes	no	yes	yes	yes	yes	yes	no	yes	no
Li Y	2268	Cellular Physiology & Biochemistry	10.1159/000475644	no		yes	no	no	no	no	1	yes	Fig 3a, b	no	no	no	no		no	no	yes	no	no
Fezai M	2279	Cellular Physiology & Biochemistry	10.1159/000475646	no		yes	no	no	no	yes	not specified	unknown		no	no	no	no		no	no	yes	no	no
Zhu H	2289	Cellular Physiology & Biochemistry	10.1159/000475648	no		no															yes	no	yes	no	yes	yes	yes	no	sometimes	no
Jia X	2307	Cellular Physiology & Biochemistry	10.1159/000475650	no		yes	no	no	no	yes	1	no		no	no	no	no		no	no	yes	no	no
Sun C	2319	Cellular Physiology & Biochemistry	10.1159/000475651	no		yes	no	no	no	no	1	yes	Fig 4b	no	no	no	no		no	no	yes	yes	yes	no	yes	yes	no
Liang S	2333	Cellular Physiology & Biochemistry	10.1159/000475652	no		yes	no	no	no	yes	1	yes	Fig 3 a-d	no	no	no	no		no	no	yes	yes	yes	no	yes	yes	yes	no	yes	no
Tan H	2350	Cellular Physiology & Biochemistry	10.1159/000475653	no		no															yes	no	yes	no	yes	yes	yes	no	yes	sometimes
Jemaa M	2363	Cellular Physiology & Biochemistry	10.1159/000475654	no		yes	no	no	no	yes	not specified	unknown		no	no	no	no		no		yes	yes	yes	no	no	no	no
Abdelazeem K	2374	Cellular Physiology & Biochemistry	10.1159/000475655	no		no															yes	no	yes	yes	yes	yes	yes	no	yes	no
Wei Q	2383	Cellular Physiology & Biochemistry	10.1159/000475909	no		yes	no	no	no	no	1	no		no	no	no	no		no	no	yes	yes	yes	no	yes	yes	yes	no	yes	no
Chen Y	2399	Cellular Physiology & Biochemistry	10.1159/000475910	no		yes	no	no	no	no	1	yes	Fig 3a	no	no	no	no		no	no	yes	yes	yes	sometimes	yes	yes	yes	no	sometimes	no
Huang Q	2411	Cellular Physiology & Biochemistry	10.1159/000475911	yes	systematic review
Dou L	2419	Cellular Physiology & Biochemistry	10.1159/000475912	no		yes	no	no	no	no	1	yes	Fig 3d, e	no	no	no	yes	Fig 3d, e	no	no	yes	no	no
Wang Y	2432	Cellular Physiology & Biochemistry	10.1159/000475913	no		yes	no	no	no	yes	1	yes	Fig 6b, d	no	no	no	no		no	no	yes	yes	yes	no	yes	yes	yes	no	no	no
Chen C	2447	Cellular Physiology & Biochemistry	10.1159/000475914	no		yes	no	no	no	yes	1	yes	Fig 2	no	no	no	no		no	no	yes	no	no
Ling Q	2461	Cellular Physiology & Biochemistry	10.1159/000475915	no		yes	no	no	no	no	1	yes	Fig 4b	no	no	no	no		no	no	yes	yes	yes	no	no	no	no
Li J	2475	Cellular Physiology & Biochemistry	10.1159/000475916	no		yes	no	no	no	no	not specified	unknown		no	no	no	yes	Fig 5a	no		yes	yes	yes	yes	no unpaired tests		yes	no	yes	no
Yu B	2489	Cellular Physiology & Biochemistry	10.1159/000475941	no		yes	no	no	no	no	1	yes	Fig 2e	no	no	no	yes	Fig 2e	no	no	yes	no	no
Zhou Y	2503	Cellular Physiology & Biochemistry	10.1159/000475942	no		yes	no	no	no	no	not specified	unknown		no	no	no	no		no		yes	yes	yes	no	yes	yes	no
Lu Q	2513	Cellular Physiology & Biochemistry	10.1159/000475946	no		no															no	no	no
Cheng K	2523	Cellular Physiology & Biochemistry	10.1159/000475971	no		yes	no	no	no	no	1	yes	Fig 4a	no	no	no	yes	Fig 4a	no	no	yes	no	no
Egler J	2534	Cellular Physiology & Biochemistry	10.1159/000475977	no		yes	no	no	no	yes	not specified	unknown		no	no	no	no		no		yes	yes	yes	yes	no	no	yes	no	yes	no
Qian J	2545	Cellular Physiology & Biochemistry	10.1159/000475978	yes	systematic review
Al Mamun Bhuyan A	1	Cellular Physiology & Biochemistry	10.1159/000477224	no		yes	no	no	no	yes	not specified	unknown		no	no	no	no		no		yes	yes	yes	yes	no	no	yes	no	yes	no
Hu C	13	Cellular Physiology & Biochemistry	10.1159/000477107	no		yes	no	no	no	no	1	yes	Fig 2b, d	no	no	no	no		no	no	yes	yes	yes	no	yes	yes	yes	no	sometimes	no
Sarwar R	22	Cellular Physiology & Biochemistry	10.1159/000477109	no		no															no	no	no
Wang Y	34	Cellular Physiology & Biochemistry	10.1159/000477112	no		yes	no	no	no	yes	1	yes	Fig 1	no	no	no	no		no	no	yes	no	no
Wang H	44	Cellular Physiology & Biochemistry	10.1159/00047711	no		yes	no	no	no	t-test	1	yes	Fig 1d	no	no	no	yes	Fig 3	no	no	yes	no	no
Yu L	55	Cellular Physiology & Biochemistry	10.1159/000477115	no		yes	no	no	no	yes	1	yes	Fig 3b	no	no	no	no		no	no	yes	yes	yes	no	yes	yes	no
Tanaka S	68	Cellular Physiology & Biochemistry	10.1159/000477116	no		no															yes	no	yes	yes	no unpaired tests		yes	no	sometimes	no
da Silva Franco	81	Cellular Physiology & Biochemistry	10.1159/000477117	no		yes	yes	no	no	yes	1	yes	Fig 2	no	no	no	no		no	no	yes	no	no
Xue X	91	Cellular Physiology & Biochemistry	10.1159/000477118	no		yes	no	no	no	no	1	no		no	no	no	no		no	no	yes	yes	yes	no	no	no	no
Cao T	103	Cellular Physiology & Biochemistry	10.1159/000477119	no		yes	no	no	no	yes	1	no		no	no	no	no		no	no	yes	no	no
Hu X	115	Cellular Physiology & Biochemistry	10.1159/000477120	no		no															yes	no	yes	no	no	no	yes	no	yes	no
Yang R	126	Cellular Physiology & Biochemistry	10.1159/000477121	no		yes	no	no	no	no	1	yes	Fig 3F	no	no	no	no		no	no	yes	yes	yes	no	yes	yes	yes	no	yes	yes
Cui J	137	Cellular Physiology & Biochemistry	10.1159/000477122	no		yes	no	no	no	yes	1	yes	Fig 1	no	no	no	yes	Fig 1	no	no	yes	no	no
Fan P	145	Cellular Physiology & Biochemistry	10.1159/000477123	no		yes	no	no	no	yes	1	yes	Fig 5?	no	no	no	no		no	no	yes	no	no
Chen Y	156	Cellular Physiology & Biochemistry	10.1159/000477308	no		yes	no	no	no	yes	not specified	unknown		no	no	no	no		no		yes	no	no
Angori S	169	Cellular Physiology & Biochemistry	10.1159/000477309	no		no															no	no	no
Yang X	185	Cellular Physiology & Biochemistry	10.1159/000477310	no		no															yes	no	yes	no	yes	yes	yes	no	sometimes	no
Hieronimus B	198	Cellular Physiology & Biochemistry	10.1159/000477311	no		yes	yes	no	no	yes	2	no		no	no	no	no		no	no	yes	no	no
Zhang M	211	Cellular Physiology & Biochemistry	10.1159/000477314	no		yes	no	no	no	no	1	yes	Fig 7 - authors appear to only have compared final time point	no	no	no	yes	Fig 7 - authors appear to only have compared final timepoint	no	no	yes	yes	yes	no	yes	yes	no
Lu X	222	Cellular Physiology & Biochemistry	10.1159/000477319	no		no															yes	no	yes	no	yes	yes	yes	no	sometimes	no
Lin W	231	Cellular Physiology & Biochemistry	10.1159/000477322	no		yes	no	no	no	yes	1	no		no	no	no	no		no	no	yes	yes	yes	no	yes	yes	no
Zhang P	242	Cellular Physiology & Biochemistry	10.1159/000477323	no		yes	yes	no	no	yes	1	yes	Fig 5a	no	no	no	yes	Fig 5a	no	no	yes	yes	yes	no	yes	yes	yes	no	yes	no
Lang C	254	Cellular Physiology & Biochemistry	10.1159/000477324	yes	systematic review
Bai J	269	Cellular Physiology & Biochemistry	10.1159/000477327	no		yes	no	no	no	no	1	yes	Fig 2	no	no	no	no		no	no	yes	no	no
Lei C	281	Cellular Physiology & Biochemistry	10.1159/000477329	no		yes	no	no	no	yes	not specified	unknown		no	no	no	no		no		yes	no	no
Jin X	295	Cellular Physiology & Biochemistry	10.1159/000477330	no		yes	no	no	no	no	1	yes	Fig 4c	no	no	no	no		no	no	yes	yes	yes	no	yes	yes	yes	no	yes	no
Yang X	306	Cellular Physiology & Biochemistry	10.1159/000477386	yes	review
Wei Y	319	Cellular Physiology & Biochemistry	10.1159/000477387	no		yes	yes	yes	no	no	1	no		no	no	no	no		no	no	yes	yes	yes	yes	no unpaired tests		yes	no	sometimes	no
Li W	333	Cellular Physiology & Biochemistry	10.1159/000477388	no		no															no	no	no
Cao Y	346	Cellular Physiology & Biochemistry	10.1159/000477389	no		yes	no	no	no	no	1	yes	Fig 3a, b	no	no	no	no		no	no	yes	yes	yes	yes	yes	yes	yes	no	yes	no
Xiang Y	357	Cellular Physiology & Biochemistry	10.1159/000477479	no		yes	no	no	no	yes	not specified	unknown		no	no	no	no		no		yes	yes	yes	no	yes	yes	yes	no	yes	no
Liu H	373	Cellular Physiology & Biochemistry	10.1159/000477481	no		no															no	no	no
Liang W	383	Cellular Physiology & Biochemistry	10.1159/000477483	no		yes	no	no	no	yes	1	yes	Fig 1	no	no	no	no		no	no	yes	yes	yes	yes	yes	yes	yes	no	yes	no
Li Q	397	Cellular Physiology & Biochemistry	10.1159/000477484	no		no															no	no	no
Liang L	407	Cellular Physiology & Biochemistry	10.1159/000477485	no		yes	no	no	no	no	1	yes	Fig 4, 5	no	no	no	yes	Fig 4, 5	no	no	yes	yes	yes	yes	no	no	yes	no	no	no
Ma F	416	Cellular Physiology & Biochemistry	10.1159/000477486	no		yes	no	no	no	yes	not specified	unknown		no	no	no	yes	Fig 1a	no	no	yes	yes	yes	no	yes	yes	yes	no	yes	no
Persson P	177	Acta Physiologica	10.1111/apha.12886	yes	other
Marinovic W	179	Acta Physiologica	10.1111/apha.12822	yes	editorial
Gordon B	181	Acta Physiologica	10.1111/apha.12846	yes	editorial
Eliasson L	184	Acta Physiologica	10.1111/apha.12847	yes	editorial
Chilton W	186	Acta Physiologica	10.1111/apha.12862	yes	editorial
Rajkumar P	189	Acta Physiologica	10.1111/apha.12813	yes	review
Janssen D	201	Acta Physiologica	10.1111/apha.12824	yes	review
Lundby C	218	Acta Physiologica	10.1111/apha.12827	yes	review
Lin F	229	Acta Physiologica	10.1111/apha.12852	yes	review
da Silva Teixeira	238	Acta Physiologica	10.1111/apha.12821	no		yes	sometimes	no	no	yes	2	no		no	no	no	yes	Fig 3	no	no	yes	no	no
Zeitzer A	251	Acta Physiologica	10.1111/apha.12820	no		no															yes	no	yes	yes	no unpaired tests		yes	no	yes	no
Russell A	263	Acta Physiologica	10.1111/apha.12819	no		yes	no	no	no	yes	not specified	unknown		no	no	no	yes	Fig 1	no		yes	no	no
Brown J	275	Acta Physiologica	10.1111/apha.12826	no		yes	yes	no	no	yes	2	no		no	no	no	no		no	no	yes	yes	yes	yes	yes	yes	yes	no	yes	no
Kuhn Y	289	Acta Physiologica	10.1111/apha.12807	no		yes	no	no	no	no	2	no		yes	yes	yes	no	discrete parameters selected from Fig 4	no	no	yes	yes	yes	yes	no unpaired tests		yes	yes	yes	yes
Joyner M	3239	Journal of Physiology	10.1113/JP274031	yes	perspective
Morley B	3241	Journal of Physiology	10.1113/JP274097	yes	perspective
Steinert J	3243	Journal of Physiology	10.1113/JP274196	yes	perspective
Bosch O	3245	Journal of Physiology	10.1113/JP274223	yes	perspective
Do M	3247	Journal of Physiology	10.1113/JP274146	yes	perspective
Landry M	3249	Journal of Physiology	10.1113/JP274052	yes	perspective
Kiernan M	3251	Journal of Physiology	10.1113/JP274183	yes	perspective
McCormick R	3253	Journal of Physiology	10.1113/JP274233	yes	perspective
Boesmans W	3255	Journal of Physiology	10.1113/JP273975	yes	perspective
Gamper N	3257	Journal of Physiology	10.1113/JP274199	yes	perspective
Thornburg K	3261	Journal of Physiology	10.1113/JP274090	yes	perspective
Manabe T	3263	Journal of Physiology	10.1113/JP274093	yes	perspective
Goldsworthy M	3265	Journal of Physiology	10.1113/JP274089	yes	other
Khalifia A	3267	Journal of Physiology	10.1113/JP273484	no		yes	yes	no	yes	yes	2	no		yes	no	yes	no		no	no	yes	no	no
Toft-Bertelsen T	3287	Journal of Physiology	10.1113/JP274135	no		yes	yes	no	no	yes	1	yes	Fig 7d	no	no	no	no		no	no	yes	yes	yes	yes	no unpaired tests		yes	no	sometimes	no
Griffiths P	3303	Journal of Physiology	10.1113/JP274178	no		yes	no	yes	yes	yes	1	yes	Fig 2	no	no	no	no		no	no	yes	no	no
Lataro R	3319	Journal of Physiology	10.1113/JP274065	no		yes	yes	no	yes	yes	2	no		no	no	no	no		no	no	yes	no	no
Harris S	3331	Journal of Physiology	10.1113/JP273555	no		yes	yes	no	no	yes	3+	no		no	no	sometimes	no		no	no	yes	no	no
Wyckelsma V	3345	Journal of Physiology	10.1113/JP273950	no		yes	yes	no	no	yes	1	yes	Fig 3	no	no	no	yes	Fig 3	no	no	yes	yes	yes	yes	yes	yes	yes	no	yes	sometimes
Koltai E	3361	Journal of Physiology	10.1113/JP273774	no		yes	yes	no	no	no	1	no		no	no	no	no		no	no	yes	yes	yes	no	no	no	yes	no	yes	no
Montero D	3377	Journal of Physiology	10.1113/JP273480	no		yes	yes	no	no	yes	1	no		no	no	sometimes	no		no	no	yes	yes	yes	yes	no unpaired tests		yes	no	yes	no
Briffa J	3389	Journal of Physiology	10.1113/JP273825	no		yes	yes	no	no	t-test	2	no		no	no	sometimes	no		no	no	yes	no	no
Grubisic V	3409	Journal of Physiology	10.1113/JP273492	no		yes	no	no	no	yes	not specified	unknown		no	no	no	no		no		yes	yes	yes	sometimes	sometimes		yes	no	yes	yes
Kania A	3425	Journal of Physiology	10.1113/JP273787	no		no															no	no	no
Nicholson E	3449	Journal of Physiology	10.1113/JP273695	no		yes	no	no	yes	no	not specified	unknown		no	no	no	no		yes		yes	yes	yes	yes	no	no	yes	no	yes	yes
Pahlberg J	3459	Journal of Physiology	10.1113/JP273398	no		no															yes	no	yes	no	yes	yes	yes	no	sometimes	yes
Kanagaratnam M	3471	Journal of Physiology	10.1113/JP273963	no		no															yes	no	yes	yes	sometimes	sometimes	yes	no	yes	yes
Ye Z	3483	Journal of Physiology	10.1113/JP272604	no		yes	no	no	no	yes	1	no		no	no	no	no		no	no	yes	yes	yes	yes	no	no	yes	no	yes	no
Tsuji T	3497	Journal of Physiology	10.1113/JP274025	no		yes	yes	no	yes	yes	not specified	unknown		no	no	yes	no		no		yes	yes	yes	no	yes	yes	yes	no	yes	sometimes
Huang A	3515	Journal of Physiology	10.1113/JP273945	no		yes	yes	yes	yes	yes	1	no		yes	yes	sometimes	no		no	no	yes	yes	yes	yes	sometimes		yes	no	yes	sometimes
Rahman A	3535	Journal of Physiology	10.1113/JP273005	no		no															yes	no	yes	no	yes	yes	yes	no	yes	no
Walsh D	3549	Journal of Physiology	10.1113/JP273915	no		yes	no	no	no	no	2	no		no	no	no	yes		no	no	yes	yes	yes	yes	yes	sometimes	yes	no	yes	no
Baumann V	3573	Journal of Physiology	10.1113/JP274059	no		yes	no	no	no	yes	1	no		sometimes	sometimes	sometimes	yes		no	no	yes	yes	yes	yes	yes	yes	yes	no	yes	yes
Augustine R	3591	Journal of Physiology	10.1113/JP273712	no		yes	yes	no	no	yes	2	no		yes	yes	yes	no		no	no	yes	yes	yes	yes	no unpaired tests		yes	yes	yes	yes
Rosini F	3607	Journal of Physiology	10.1113/JP273670	no		yes	yes	no	no	yes	2	no		yes	yes	no	yes		no	no	yes	yes	yes	no	yes	yes	yes	no	yes	no
Hanna L	3621	Journal of Physiology	10.1113/JP273850	no		yes	yes	no	yes	yes	2	no		no	no	sometimes	no		no	no	yes	yes	yes	yes	no unpaired tests		yes	no	yes	no
Ru F	3651	Journal of Physiology	10.1113/JP273795	no		yes	yes	no	no	yes	not specified	unknown		no	no	no	no		no		yes	yes	yes	no	yes	yes	yes	no	yes	no
Chiesa S	3667	Journal of Physiology	10.1113/JP274047	yes	letter
Brunt V	3669	Journal of Physiology	10.1113/JP274129	yes	letter
Pun M	3671	Journal of Physiology	10.1113/JP274018	yes	letter
Hoiland R	3673	Journal of Physiology	10.1113/JP274100	yes	letter
Knollman B	3683	Journal of Physiology	10.1111/tjp.12452	yes	editorial
Zimmermann W	3685	Journal of Physiology	10.1113/JP273098	yes	review
Melkani G	3691	Journal of Physiology	10.1113/JP273094	yes	review
Thorin E	3701	Journal of Physiology	10.1113/JP274297	yes	perspective
Hotta K	3703	Journal of Physiology	10.1113/JP274172	no		yes	yes	yes	yes	yes	3+	no		no	no	sometimes	no		no	no	yes	no	no
Ferdooni H	3721	Journal of Physiology	10.1113/JP274134	no		no															yes	no	yes	no	yes	yes	yes	no	yes	yes
Kwong J	3743	Journal of Physiology	10.1113/JP273059	yes	review
Kohlhaas M	3753	Journal of Physiology	10.1113/JP273609	yes	review
Jespersen N	3765	Journal of Physiology	10.1113/JP273408	no		yes	sometimes	no	no	yes	1	no		no	no	no	no		no	no	yes	no	no
Kohlhaas M	3781	Journal of Physiology	10.1113/JP273750	no		yes	yes	no	no	yes	2	no		no	no	no	yes	Fig 8a	no	no	yes	yes	yes	yes	no	no	yes	no	sometimes	no
Garrott K	3799	Journal of Physiology	10.1113/JP273873	no		yes	yes	no	no	yes	not specified	unknown		no	no	no	yes	Fig 3	no		yes	yes	yes	yes	no	no	yes	no	yes	no
Crocini C	3815	Journal of Physiology	10.1113/JP273042	yes	review
Veeraraghaven R	3823	Journal of Physiology	10.1113/JP273058	yes	review
Maxwell J	3835	Journal of Physiology	10.1113/JP273611	no		no															yes	no	yes	no	yes	yes	yes	no	yes	no
Torrente A	3847	Journal of Physiology	10.1113/JP274249	no		yes	yes	no	no	yes	2	no		no	no	no	yes	Fig 7	no	no	yes	yes	yes	yes	no unpaired tests		yes	no	yes	no
Gattoni S	3867	Journal of Physiology	10.1113/JP273879	no		no															no	no	no
Kofron C	3891	Journal of Physiology	10.1113/JP273100	yes	review
Antonopolus A	3907	Journal of Physiology	10.1113/JP273049	yes	review
Zaglia T	3919	Journal of Physiology	10.1113/JP273120	yes	review
Robinson P	3931	Journal of Physiology	10.1113/JP273046	yes	review
Huke S	3939	Journal of Physiology	10.1113/JP273047	yes	review
Chen-Izu Y	3949	Journal of Physiology	10.1113/JP273101	yes	review
Donal E	3959	Journal of Physiology	10.1113/JP274108	yes	perspective
Hulshof H	3961	Journal of Physiology	10.1113/JP273526	no		yes	no	no	no	yes	1	no		no	no	no	no		no	no	yes	no	no
Williams A	3973	Journal of Physiology	10.1113/JP273368	no		yes	no	yes	yes	yes	1	yes	Table 2	no	no	yes	no		no	no	yes	yes	yes	yes	yes	yes	yes	no	yes	yes
Flenner F	3987	Journal of Physiology	10.1113/JP273769	no		yes	yes	no	no	yes	2	yes	Fig 4	no	no	no	yes	Fig 1	no	no	yes	yes	yes	no	yes	yes	yes	no	no	no
Dobrev D	4001	Journal of Physiology	10.1113/JP273048	yes	review
Greiser M	4009	Journal of Physiology	10.1113/JP273045	yes	review
Syeda F	4019	Journal of Physiology	10.1113/JP273123	yes	review
Tomek J	4027	Journal of Physiology	10.1113/JP273043	yes	review
Ottaviani L	4037	Journal of Physiology	10.1113/JP273129	yes	review
Gilda J	4051	Journal of Physiology	10.1113/JP273607	yes	review
Lorenz K	4073	Journal of Physiology	10.1113/JP274064	yes	review
Federico M	4089	Journal of Physiology	10.1113/JP273714	no		yes	no	no	no	yes	not specified	unknown		no	no	no	no		no	no	yes	yes	yes	yes	yes	yes	yes	no	sometimes	no
Roden D	4109	Journal of Physiology	10.1113/JP273122	yes	review
Stenholm S	85	IJBNPA	10.1186/s12966-017-0539-2	no		no															no	no	no
James P	84	IJBNPA	10.1186/s12966-017-0537-4	no		no															no	no	no
Schoeppe S	83	IJBNPA	10.1186/s12966-017-0538-3	no		no															no	no	no
da Silva B	82	IJBNPA	10.1186/s12966-017-0536-5	no		no															no	no	no
Okely A	81	IJBNPA	10.1186/s12966-017-0535-6	no		no															no	no	no
Schneller M	80	IJBNPA	10.1186/s12966-017-0534-7	no		yes	yes	no	no	no	1	no		no	no	no	no		no	no	yes	no	no
Hipp J	79	IJBNPA	10.1186/s12966-017-0533-8	no		no															no	no	no
den Braver N	78	IJBNPA	10.1186/s12966-017-0532-9	no		no															no	no	no
Tremblay M	75	IJBNPA	10.1186/s12966-017-0525-8	no		no															no	no	no
Caspi C	76	IJBNPA	10.1186/s12966-017-0531-x	no		no															no	no	no
Puthusseri B	783	AJP Lung	10.1152/ajplung.00291.2016	no		yes	no	no	no	yes	1	no		no	no	no	no		no	no	yes	no	no
Trac P	797	AJP Lung	10.1152/ajplung.00379.2016	no		yes	no	no	no	no	1	yes	Fig 14b	no	no	sometimes	no		no	no	yes	yes	yes	no	no	no	yes	no	sometimes	no
Yocum G	812	AJP Lung	10.1152/ajplung.00064.2017	no		yes	yes	no	no	yes	1	yes	Fig 9c	no	no	no	yes	Fig 9c	no	no	yes	yes	yes	no	yes	yes	yes	no	yes	no
Haick J	822	AJP Lung	10.1152/ajplung.00567.2016	no		yes	yes	no	no	yes	1	yes		no	no	no	yes		no	no	yes	yes	yes	yes	no	sometimes	yes	no	sometimes	no
Lee K	835	AJP Lung	10.1152/ajplung.00350.2016	no		yes	no	no	no	no	not specified	unknown		no	no	no	no		no		yes	no	no
Ijpma G	845	AJP Lung	10.1152/ajplung.00353.2016	no		yes	yes	no	no	no	1	no		no	no	sometimes	no		no	no	yes	yes	yes	no	yes	yes	yes	no	yes	yes
Zaslona Z	855	AJP Lung	10.1152/ajplung.00072.2017	no		yes	no	no	no	no	not specified	unknown		no	no	no	no		no		yes	yes	yes	no	yes	yes	yes	no	sometimes	no
Medal R	861	AJP Lung	10.1152/ajplung.00554.2016	no		yes	no	no	no	no	1	yes	Fig 7	no	no	no	no		no	no	yes	no	no
Keeler A	873	AJP Lung	10.1152/ajplung.00568.2016	no		yes	sometimes	no	yes	yes	2	no		no	no	sometimes	no		no	no	yes	yes	yes	no	yes	yes	yes	no	yes	yes
Pozarsla A	882	AJP Lung	10.1152/ajplung.00492.2016	no		yes	yes	no	no	yes	1	yes	Fig 7a, b	no	no	yes	no		no	no	yes	yes	yes	yes	yes	yes	yes	no	yes	yes
Alsafadi H	896	AJP Lung	10.1152/ajplung.00084.2017	no		yes	yes	no	no	yes	2	no		no	no	no	no		no	no	yes	no	no
Singla S	903	AJP Lung	10.1152/ajplung.00034.2017	no		yes	yes	no	no	t-test	2	no		no	no	no	no		no	no	yes	yes	yes	no	yes	yes	yes	no	yes	no
Bertrand C	912	AJP Lung	10.1152/ajplung.00178.2016	no		no															yes	no	yes	yes	yes		yes	no	yes	yes
Ding Q	926	AJP Lung	10.1152/ajplung.00121.2016	no		no															yes	no	yes	no	yes	yes	yes	no	sometimes	no
Guo W	936	AJP Lung	10.1152/ajplung.00256.2016	no		no															yes	no	yes	no	yes	yes	yes	no	sometimes	sometimes
Wyman A	945	AJP Lung	10.1152/ajplung.00473.2016	no		no															yes	no	yes	yes	yes		yes	no	yes	yes
Andres D	959	AJP Lung	10.1152/ajplung.00281.2015	no		yes	yes	no	no	yes	2	no		no	no	no	no		no	no	yes	no	no
Wicher S	969	AJP Lung	10.1152/ajplung.00530.2016	no		yes	sometimes	no	yes	yes	2	no		no	no	no	no		no	no	yes	no	no
Rajput C	983	AJP Lung	10.1152/ajplung.00368.2016	no		yes	yes	no	no	yes	1	yes	Fig 5	no	no	no	no		no	no	yes	yes	yes	yes	no	no	yes	no	yes	no
Dogan M	994	AJP Lung	10.1152/ajplung.00550.2016	no		yes	no	no	yes	yes	2	no		no	no	no	no		no	no	yes	yes	yes	yes	no unpaired tests		yes	no	yes	no
Soni D	1003	AJP Lung	10.1152/ajplung.00008.2017	no		yes	no	no	no	no	not specified	unknown		no	no	no	yes		no		yes	yes	yes	no	yes	yes	yes	no	yes	no
Ordija C	1018	AJP Lung	10.1152/ajplung.00067.2017	no		yes	sometimes	no	no	no	2	no		no	no	yes	no		no	no	yes	yes	yes	yes	yes	yes	yes	no	yes	yes
Sedwick	611	J General Physiol	10.1085/jgp.201711820	yes	other
Sula A	613	J General Physiol	10.1085/jgp.201611740	yes	other
Sand R	623	J General Physiol	10.1085/jgp.201611600	no		no															yes	no	yes	yes	yes	yes	yes	no	sometimes	no
Tajada S	639	J General Physiol	10.1085/jgp.201611709	no		yes	no	no	no	no	not specified	unknown		no	no	no	yes	Fig 3 c,d	no		yes	yes	yes	no	yes	yes	yes	no	no	no
Amin J	661	J General Physiol	10.1085/jgp.201711762	no		yes	no	no	no	yes	not specified	unknown		no	no	no	no		no		yes	yes	yes	yes	yes	yes	yes	no	yes	no
de Jong J	508	AJP Endo	10.1152/ajpendo.00437.2016	no		yes	yes	no	no	yes	2	no		no	no	yes	yes	Fig 1	no	no	yes	no	no
Hosokawa K	471	AJP Endo	10.1152/ajpendo.00328.2016	no		yes	no	no	no	no	1	yes	Fig 1a,b,d,e	no	no	no	no		no	no	yes	no	no
Dahlman I	482	AJP Endo	10.1152/ajpendo.00251.2016	no		no															yes	no	yes	no	no	no	yes	no	yes	sometimes
Miotto P	461	AJP Endo	10.1152/ajpendo.00438.2016	no		yes	no	no	no	yes	2	no		no	no	no	no		no	no	yes	yes	yes	yes	no	no	yes	no	yes	sometimes
Kang S	495	AJP Endo	10.1152/ajpendo.00389.2016	no		yes	no	no	no	yes	1	yes	Fig 4	no	no	no	no		no	no	yes	yes	yes	no	yes	yes	yes	no	yes	no
Have G	519	AJP Endo	10.1152/ajpendo.00351.2016	no		no															yes	no	yes	yes	no	no	yes	no	yes	no
Jimi S	1225	Journal of Cellular Physiology	10.1002/jcp.25595	no		no															no	no	no
Zotti T	1233	Journal of Cellular Physiology	10.1002/jcp.25676	yes	review
Yuan Y	1239	Journal of Cellular Physiology	10.1002/jcp.25688	yes	review
Li P	1246	Journal of Cellular Physiology	10.1002/jcp.25696	yes	review
VanOudenhove J	1254	Journal of Cellular Physiology	10.1002/jcp.25567	yes	review
Shan T	1258	Journal of Cellular Physiology	10.1002/jcp.25697	yes	review
Kehler J	1262	Journal of Cellular Physiology	10.1002/jcp.25597	yes	perspective
Ross J	1270	Journal of Cellular Physiology	10.1002/jcp.25678	no		yes	yes	no	no	no	3+	no		no	no	no	yes	Table 1	no	no	yes	no	no
Dean M	1275	Journal of Cellular Physiology	10.1002/jcp.25586	no		no															yes	no	yes	yes	no unpaired tests		yes	no	yes	sometimes
Tabeian H	1287	Journal of Cellular Physiology	10.1002/jcp.25593	no		yes	yes	no	no	yes	2	no		no	no	no	no		no	no	yes	no	no
Dobson J	1295	Journal of Cellular Physiology	10.1002/jcp.25596	no		no															no	no	no
Liu X	1306	Journal of Cellular Physiology	10.1002/jcp.25599	no		no															yes	no	yes	yes	no	no	yes	no	yes	no
Courbon G	1318	Journal of Cellular Physiology	10.1002/jcp.25601	no		no															no	no	no
Latsoudis H	1326	Journal of Cellular Physiology	10.1002/jcp.25602	no		no															yes	no	yes	no	sometimes	sometimes	yes	yes	yes	yes
Huang C	1337	Journal of Cellular Physiology	10.1002/jcp.25610	no		no															yes	no	yes	no	yes	yes	yes	no	yes	no
Marin-Hernandez	1346	Journal of Cellular Physiology	10.1002/jcp.25617	no		no															yes	no	yes	yes	yes	yes	yes	no	sometimes	no
Xie Z	1360	Journal of Cellular Physiology	10.1002/jcp.25620	no		yes	yes	no	no	yes	2	no		no	no	no	no		no	no	yes	yes	yes	no	yes	yes	yes	no	yes	no
Matos M	1368	Journal of Cellular Physiology	10.1002/jcp.25622	no		no															no	no	no
Tian C	1387	Journal of Cellular Physiology	10.1002/jcp.25628	no		no															yes	no	yes	no	yes	yes	yes	no	sometimes	no
Moller J	1396	Journal of Cellular Physiology	10.1002/jcp.25633	no		yes	yes	no	no	no	2	no		no	no	no	yes	Fig 5	no	no	yes	no	no
Molina L	1404	Journal of Cellular Physiology	10.1002/jcp.25634	no		yes	yes	no	no	no	2	no		no	no	no	no		no	no	yes	yes	yes	no	sometimes	sometimes	yes	no	yes	no
Chacon-Cabrera	1415	Journal of Cellular Physiology	10.1002/jcp.25635	no		yes	yes	no	no	yes	1	yes	Fig 6	no	no	no	yes	Fig 6	no	no	yes	yes	yes	yes	yes	yes	yes	no	no	no
Lim W	1428	Journal of Cellular Physiology	10.1002/jcp.25637	no		yes	no	no	no	no	not specified	unknown		no	no	no	no		?		yes	no	no
Wolfson M	1441	Journal of Cellular Physiology	10.1002/jcp.25640	no		yes	sometimes	no	no	yes	2	no		no	no	no	no		no	no	yes	no	no
Su Y	1448	Journal of Cellular Physiology	10.1002/jcp.25644	no		yes	no	no	no	yes	not specified	unknown		no	no	no	no		no		yes	yes	yes	yes	yes	yes	no
Benedetti E	1458	Journal of Cellular Physiology	10.1002/jcp.25648	no		yes	no	no	no	yes	not specified	unknown		no	no	no	no		no		yes	yes	yes	yes	yes	yes	yes	no	yes	no
Wang C	1467	Journal of Cellular Physiology	10.1002/jcp.25649	no		no															yes	no	yes	yes	no	no	yes	no	no	sometimes
Pagani S	1478	Journal of Cellular Physiology	10.1002/jcp.25651	no		yes	no	no	no	yes	1	no		no	no	no	no		no	no	yes	yes	yes	no	yes	yes	yes	no	yes	no
Shahidullah M	1489	Journal of Cellular Physiology	10.1002/jcp.25654	no		yes	no	no	no	yes	1	yes	Fig 4	no	no	no	no		no	no	yes	no	no
Barreda-Monso M	1501	Journal of Cellular Physiology	10.1002/jcp.25655	no		yes	yes	no	no	yes	2	yes	Fig 1b	no	no	sometimes	no		no	no	yes	no	no
Certal M	1511	Journal of Cellular Physiology	10.1002/jcp.25656	no		yes	no	no	no	yes	1	yes	Fig 4	no	no	sometimes	yes	Fig 3	no	no	yes	no	no
Lim W	1527	Journal of Cellular Physiology	10.1002/jcp.25659	no		yes	no	no	no	no	not specified	unknown		no	no	no	no		yes		yes	no	no
Rouabhia M	1539	Journal of Cellular Physiology	10.1002/jcp.25677	no		yes	yes	no	no	yes	1	no		no	no	no	no		no	no	yes	no	no
Zhao D	1548	Journal of Cellular Physiology	10.1002/jcp.25681	no		yes	no	no	no	yes	1	no		no	no	no	no		no	no	yes	no	no
Diaz-Romero J	1559	Journal of Cellular Physiology	10.1002/jcp.25682	no		yes	yes	no	no	yes	1	yes	Fig 6	no	no	no	no		no	no	yes	no	no
Gamucci T	1571	Journal of Cellular Physiology	10.1002/jcp.25685	no		no															no	no	no
Alexander R	998	AJP Renal	10.1152/ajprenal.00032.2017	yes	review
Havasi A	1016	AJP Renal	10.1152/ajprenal.00601.2015	yes	review
Wu P	1090	AJP Renal	10.1152/ajprenal.00642.2016	no		yes	no	no	no	yes	1	no		no	no	no	no		no	no	yes	yes	yes	yes	yes	yes	yes	no	yes	no
Kriz W	1101	AJP Renal	10.1152/ajprenal.00020.2017	no		no															no	no	no
Furuta I	1112	AJP Renal	10.1152/ajprenal.00623.2016	no		no															no	no	no
Araujo M	1120	AJP Renal	10.1152/ajprenal.00662.2016	no		yes	yes	yes	yes	yes	2	no		no	no	no	no		no	no	yes	yes	yes	yes	no	no	yes	no	no	no
Weinstein A	925	AJP Renal	10.1152/ajprenal.00536.2016	yes	mathematical model
Heuer J	951	AJP Renal	10.1152/ajprenal.00443.2016	no		yes	yes	no	no	yes	1	no		no	no	sometimes	no		no	no	yes	yes	yes	yes	no	no	yes	no	sometimes	no
Zhou X	963	AJP Renal	10.1152/ajprenal.00078.2017	no		yes	no	no	no	no	not specified	unknown		no	no	no	yes	Fig 6b	no		yes	yes	yes	no	yes	yes	yes	no	no	no
Fan F	971	AJP Renal	10.1152/ajprenal.00529.2016	no		yes	no	yes	yes	yes	2	no		no	no	no	no		no	no	yes	no	no
Muralidharan J	982	AJP Renal	10.1152/ajprenal.00569.2016	no		yes	yes	no	no	no	1	no		no	no	sometimes	no		no	no	yes	yes	yes	no	yes	yes	yes	no	yes	sometimes
Uedono H	992	AJP Renal	10.1152/ajprenal.00645.2016	no		no															no	no	no
Alexandre E	1026	AJP Renal	10.1152/ajprenal.00013.2017	no		yes	no	no	no	yes	1	yes	Fig 3e	no	no	no	yes	Fig 3e	no	no	yes	yes	yes	no	yes	yes	yes	no	sometimes	no
Monzon C	1035	AJP Renal	10.1152/ajprenal.00671.2016	no		no															yes	no	yes	yes	no unpaired tests		yes	no	yes	no
Slattery P	1044	AJP Renal	10.1152/ajprenal.00565.2016	no		yes	yes	no	no	yes	2	no		no	no	no	no		no	no	yes	yes	yes	no	no	no	yes	no	yes	sometimes
Su Y	1056	AJP Renal	10.1152/ajprenal.00593.2016	no		yes	no	no	no	yes	2	yes		sometimes	no	sometimes	no		no	no	yes	yes	yes	no	yes	yes	yes	no	yes	no
Pathare G	1063	AJP Renal	10.1152/ajprenal.00644.2016	no		yes	yes	no	no	yes	1	no		no	no	no	yes	Fig 3	no	no	yes	no	no
Mironova E	1073	AJP Renal	10.1152/ajprenal.00401.2016	no		yes	sometimes	sometimes	yes	yes	2	no		no	no	no	no		no	no	yes	no	no
Su Z	1128	AJP Renal	10.1152/ajprenal.00600.2016	no		yes	no	no	no	yes	1	yes	Table 2	no	no	no	no		no	no	yes	yes	yes	no	no	no	no
Church R	1141	AJP Renal	10.1152/ajprenal.00344.2016	no		yes	sometimes	no	no	yes	1	yes	Fig 11	no	no	no	yes	Fig 1e	no	no	yes	yes	yes	yes	yes	yes	yes	no	yes	sometimes
Wei J	1158	AJP Renal	10.1152/ajprenal.00527.2016	no		yes	no	no	yes	no	2	no		no	no	no	no		no	no	yes	yes	yes	yes	no unpaired tests		no
Ceron C	1166	AJP Renal	10.1152/ajprenal.00461.2016	no		no															yes	no	yes	yes	no	no	yes	no	yes	yes
Ito Y	1184	AJP Renal	10.1152/ajprenal.00305.2016	no		no															yes	no	yes	yes	no	no	yes	no	yes	no
Li Y	1081	AJP Renal	10.1152/ajprenal.00037.2017	no		yes	no	no	no	yes	1	no		no	no	no	no		no	no	yes	yes	yes	no	sometimes	sometimes	yes	no	yes	no
Praetorius J	673	AJP Cell	10.1152/ajpcell.00041.2017	yes	review
Xu D	687	AJP Cell	10.1152/ajpcell.00093.2017	yes	editorial
Call J	724	AJP Cell	10.1152/ajpcell.00348.2016	no		yes	yes	no	no	yes	2	no		no	no	sometimes	yes	Fig 4	no	no	yes	no	no
Shaw A	689	AJP Cell	10.1152/ajpcell.00026.2016	no		yes	no	no	yes	yes	not specified	unknown		no	no	no	no		no		yes	yes	yes	yes	no	no	yes	no	yes	no
Yao	697	AJP Cell	10.1152/ajpcell.00292.2016	no		yes	no	no	no	yes	not specified	unknown		no	no	no	no		no		yes	yes	yes	no	no	no	yes	no	yes	no
Cuppoletti J	707	AJP Cell	10.1152/ajpcell.00267.2016	no		yes	no	yes	yes	yes	1	no		no	no	no	no		no	no	yes	yes	yes	no	yes	yes	no
Eshbach M	733	AJP Cell	10.1152/ajpcell.00021.2017	no		no															no	no	no
Davis M	741	AJP Cell	10.1152/ajpcell.00364.2016	no		yes	no	no	no	yes	1	yes	Fig 1a	no	no	no	no		no	no	yes	no	no
Kim Y	749	AJP Cell	10.1152/ajpcell.00346.2016	no		yes	no	no	no	no	not specified	unknown		no	no	no	yes	Fig 2c	no		yes	yes	yes	yes	no unpaired tests		yes	no	yes	no
Geue S	765	AJP Cell	10.1152/ajpcell.00262.2016	no		no															yes	no	yes	no	yes	yes	yes	no	sometimes	no
Leise T	187	J Biological Rhythms	10.1177/0748730417709105	yes	perspective
Backlund P	195	J Biological Rhythms	10.1177/0748730417700458	no		no															yes	no	yes	sometimes	sometimes		yes	no	yes	no
Luciano A	212	J Biological Rhythms	10.1177/0748730417704534	no		yes	yes	no	no	yes	2	no		no	no	no	no		no	no	yes	yes	yes	no	yes	yes	yes	no	yes	no
Chew K	222	J Biological Rhythms	10.1177/0748730417704766	no		yes	yes	no	no	yes	2	no		no	no	no	yes	Fig 5g	no	no	yes	yes	yes	no	no	no	yes	no	yes	no
Beersma D	237	J Biological Rhythms	10.1177/0748730417706581	yes	review
Ikeno T	246	J Biological Rhythms	10.1177/0748730417702246	no		yes	yes	no	no	yes	1	no		no	no	sometimes	no		no	no	yes	no	no
Cuesta M	257	J Biological Rhythms	10.1177/0748730417702974	no		yes	yes	no	yes	yes	2	no		no	no	sometimes	no		no	no	yes	yes	yes	no	no	no	yes	no	yes	yes
Woelders T	274	J Biological Rhythms	10.1177/0748730417696787	no		no															no	no	no
Varyani F	537	AJP Gastro	10.1152/ajpgi.00024.2017	yes	review
Young V	623	AJP Gastro	10.1152/ajpgi.00341.2016	yes	review
Omary M	628	AJP Gastro	10.1152/ajpgi.00455.2016	yes	review
Balemans D	635	AJP Gastro	10.1152/ajpgi.00401.2016	yes	perspective
Menhali A	649	AJP Gastro	10.1152/ajpgi.00366.2016	no		yes	yes	no	no	yes	2	no		no	no	no	no		no	no	yes	yes	yes	no	yes	yes	yes	no	yes	no
Ward J	550	AJP Gastro	10.1152/ajpgi.00256.2016	no		yes	no	no	no	yes	1	yes	Fig 2	no	no	no	yes	Fig 2	no	no	yes	yes	yes	no	no	no	no
Silva R	658	AJP Gastro	10.1152/ajpgi.00327.2016	no		yes	yes	no	no	yes	2	no		no	no	no	yes	Fig 1	no	no	yes	no	no
Krishnan A	666	AJP Gastro	10.1152/ajpgi.00213.2016	no		no															yes	no	yes	no	yes	yes	yes	no	no	no
Karl J	559	AJP Gastro	10.1152/ajpgi.00066.2017	no		yes	yes	no	yes	no	2	no		no	no	sometimes	no		no	no	yes	no	no
Strege P	572	AJP Gastro	10.1152/ajpgi.00429.2016	no		yes	yes	no	no	yes	2	no		no	no	no	yes	Fig 5	no	no	yes	yes	yes	yes	yes		yes	no	yes	no
Stelzl T	580	AJP Gastro	10.1152/ajpgi.00343.2016	no		yes	yes	no	no	yes	1	yes	Fig 7a,b	no	no	no	no		no	no	yes	yes	yes	yes	sometimes	yes	yes	no	sometimes	no
Kishida K	592	AJP Gastro	10.1152/ajpgi.00416.2016	no		yes	yes	no	no	yes	3+	no		no	no	no	no		no	no	yes	no	no
Toth A	606	AJP Gastro	10.1152/ajpgi.00060.2017	no		no															no	no	no
Minacapelli C	615	AJP Gastro	10.1152/ajpgi.00268.2016	no		no															yes	no	yes	no	yes	yes	yes	no	yes	yes
Athyros V	681	AJP Gastro	10.1152/ajpgi.00101.2017	yes	letter
Nieman G	1516	JAP	10.1152/japplphysiol.00123.2017	yes	review
Coffman K	1425	JAP	10.1152/japplphysiol.00694.2016	no		yes	yes	no	no	yes	1	yes	Table 1	no	no	sometimes	yes	Table 1	no	no	yes	no	no
McCrudden M	1435	JAP	10.1152/japplphysiol.00514.2016	no		yes	yes	no	yes	yes	2	no		no	no	no	no		no	no	yes	no	no
Repesse X	1373	JAP	10.1152/japplphysiol.00958.2016	no		yes	yes	yes	yes	yes	2	no		yes	yes	sometimes	no		no	no	yes	yes	yes	yes	no unpaired tests		yes	no	yes	yes
Hopkins S	1379	JAP	10.1152/japplphysiol.01013.2016	no		yes	yes	yes	yes	t-test	1	no		no	no	yes	no		no	no	yes	no	no
Eshun D	1388	JAP	10.1152/japplphysiol.00467.2016	no		no															no	no	no
Marshall-Geobel K	1398	JAP	10.1152/japplphysiol.00885.2016	no		yes	yes	no	no	yes	2	no		no	no	sometimes	no		yes	no	yes	no	no
Ospina-Tascon G	1406	JAP	10.1152/japplphysiol.00886.2016	no		yes	yes	no	yes	yes	2	no		no	no	sometimes	no		no	no	yes	no	no
Haynes A	1418	JAP	10.1152/japplphysiol.01057.2016	no		no															yes	no	yes	yes	no unpaired tests		yes	no	yes	yes
Ax A	1445	JAP	10.1152/japplphysiol.00887.2015	no		no															yes	no	yes	yes	no unpaired tests		yes	no	yes	yes
Alanova P	1452	JAP	10.1152/japplphysiol.00671.2016	no		yes	yes	no	no	yes	2	no		no	no	no	no		no	no	yes	no	no
Kou X	1462	JAP	10.1152/japplphysiol.00018.2017	no		yes	no	no	no	yes	not specified	unknown		no	no	no	no		no		yes	no	no
Govender S	1470	JAP	10.1152/japplphysiol.01069.2016	no		no															no	no	no
Berryman C	1485	JAP	10.1152/japplphysiol.01039.2016	no		yes	yes	yes	yes	yes	1	no		no	no	sometimes	no		no	no	yes	no	no
Abe Y	1494	JAP	10.1152/japplphysiol.01130.2016	no		yes	yes	no	yes	yes	2	no		no	no	no	no		no	no	yes	yes	yes	yes	no	no	yes	no	yes	no
Souron R	1504	JAP	10.1152/japplphysiol.00793.2016	no		yes	yes	sometimes	yes	yes	3+	no		no	no	sometimes	no		no	no	yes	no	no
Sacco I	1523	JAP	10.1152/japplphysiol.00128.2017	yes	letter
Allen M	1525	JAP	10.1152/japplphysiol.00330.2017	yes	letter
Ng J	303	Fronteirs in Physiology	10.3389/fphys.2017.00303	yes	review
Tafreshi A	327	Fronteirs in Physiology	10.3389/fphys.2017.00327	no		no															no	no	no
Brown N	329	Fronteirs in Physiology	10.3389/fphys.2017.00329	no		no															no	no	no
Messer A	348	Fronteirs in Physiology	10.3389/fphys.2017.00348	no		yes	yes	no	no	no	1	no		no	no	no	no		no	no	yes	yes	yes	yes	yes	yes	yes	no	yes	yes
Duvivier B	353	Fronteirs in Physiology	10.3389/fphys.2017.00353	no		no															no	no	no
Brohi R	354	Fronteirs in Physiology	10.3389/fphys.2017.00354	no		no															no	no	no
Li Y	358	Fronteirs in Physiology	10.3389/fphys.2017.00358	yes	systematic review
Dai Y	359	Fronteirs in Physiology	10.3389/fphys.2017.00359	no		yes	no	no	no	yes	not specified	unknown		no	no	no	no		no	no	yes	no	no
von Rosenberg W	360	Fronteirs in Physiology	10.3389/fphys.2017.00360	no		no															no	no	no
Shuturminska K	368	Fronteirs in Physiology	10.3389/fphys.2017.00368	no		no															no	no	no
Clausen M	371	Fronteirs in Physiology	10.3389/fphys.2017.00371	yes	review
Chen N	375	Fronteirs in Physiology	10.3389/fphys.2017.00375	no		yes	no	no	no	yes	1	no		no	no	no	no		no	no	yes	no	no
Krivanek J	376	Fronteirs in Physiology	10.3389/fphys.2017.00376	yes	review
Chupel M	377	Fronteirs in Physiology	10.3389/fphys.2017.00377	no		no															no	no	no
Pecze L	378	Fronteirs in Physiology	10.3389/fphys.2017.00378	yes	review
Simon F	379	Fronteirs in Physiology	10.3389/fphys.2017.00379	no		yes	yes	no	no	yes	2	no		no	no	no	no		no	no	yes	no	no
Gil C	380	Fronteirs in Physiology	10.3389/fphys.2017.00380	no		no															yes	no	yes	no	yes	yes	yes	no	sometimes	no
Pimienta M	381	Fronteirs in Physiology	10.3389/fphys.2017.00381	yes	review
Matsoukas I	382	Fronteirs in Physiology	10.3389/fphys.2017.00382	yes	review
D'Souza R	383	Fronteirs in Physiology	10.3389/fphys.2017.00383	no		no															yes	no	yes	no	yes	yes	yes	no	yes	yes
Romecin P	384	Fronteirs in Physiology	10.3389/fphys.2017.00384	no		yes	yes	no	no	yes	1	yes	Table 1	no	no	no	no		no	no	yes	no	no
Liu Z	385	Fronteirs in Physiology	10.3389/fphys.2017.00385	yes	review
Borys J	386	Fronteirs in Physiology	10.3389/fphys.2017.00386	no		no															no	no	no
Garcia-Retortillo S	387	Fronteirs in Physiology	10.3389/fphys.2017.00387	no		no															yes	no	yes	no	no	no	yes	yes	yes	yes
Benis N	388	Fronteirs in Physiology	10.3389/fphys.2017.00388	no		no															no	no	no
Messias L	389	Fronteirs in Physiology	10.3389/fphys.2017.00389	yes	review
Jackman S	390	Fronteirs in Physiology	10.3389/fphys.2017.00390	no		yes	yes	yes	yes	yes	2	no		no	no	sometimes	no		no	no	yes	yes	yes	yes	no unpaired tests		yes	no	yes	yes
McQuade	391	Fronteirs in Physiology	10.3389/fphys.2017.00391	no		yes	no	no	no	yes	1	yes	Fig 2a	no	no	no	yes	Fig 2a	no	no	yes	yes	yes	yes	yes	yes	yes	no	yes	no
Jardin I	392	Fronteirs in Physiology	10.3389/fphys.2017.00392	yes	review
How M	393	Fronteirs in Physiology	10.3389/fphys.2017.00393	no		no															yes	no	yes	no	no	no	yes	yes	yes	no
Li Y	394	Fronteirs in Physiology	10.3389/fphys.2017.00394	no		yes	no	no	no	yes	1	yes	Fig 3	no	no	no	no		no	no	yes	yes	yes	no	yes	yes	yes	no	yes	no
Wu J	395	Fronteirs in Physiology	10.3389/fphys.2017.00395	no		yes	no	no	yes	no	1	exclude		no	no	no	no		no	not for RM ANOVA	yes	no	no
Eriksson O	396	Fronteirs in Physiology	10.3389/fphys.2017.00396	yes	editorial
Norton E	397	Fronteirs in Physiology	10.3389/fphys.2017.00397	yes	review
Gasse B	398	Fronteirs in Physiology	10.3389/fphys.2017.00398	no		no															no	no	no
Gillis	400	Fronteirs in Physiology	10.3389/fphys.2017.00400	no		no															no	no	no
Kolliopoulou A	399	Fronteirs in Physiology	10.3389/fphys.2017.00399	yes	review
Shannon O	401	Fronteirs in Physiology	10.3389/fphys.2017.00401	no		yes	yes	no	yes	yes	3+	no		no	no	sometimes	no		no	no	yes	no	no
Darmaillacq A	402	Fronteirs in Physiology	10.3389/fphys.2017.00402	yes	review
Ponte G	403	Fronteirs in Physiology	10.3389/fphys.2017.00403	yes	perspective
Vandersickel N	404	Fronteirs in Physiology	10.3389/fphys.2017.00404	yes	review
Robinson C	405	Fronteirs in Physiology	10.3389/fphys.2017.00405	no		no															no	no	no
Wiewelhove T	406	Fronteirs in Physiology	10.3389/fphys.2017.00406	no		no															yes	no	yes	yes	no unpaired tests		yes	yes	yes	yes
Sahl R	407	Fronteirs in Physiology	10.3389/fphys.2017.00407	no		no															yes	no	yes	yes	no unpaired tests		yes	no	yes	sometimes
Jones S	408	Fronteirs in Physiology	10.3389/fphys.2017.00408	no		no															yes	no	yes	sometimes	yes	yes	yes	no	yes	yes
Posada-Quintero H	409	Fronteirs in Physiology	10.3389/fphys.2017.00409	no		no															no	no	no
Morrison S	410	Fronteirs in Physiology	10.3389/fphys.2017.00410	no		yes	yes	yes	yes	yes	2	no		no	no	sometimes	no		no	no	yes	no	no
Lin R	411	Fronteirs in Physiology	10.3389/fphys.2017.00411	no		yes	no	no	no	yes	2	no		no	no	no	yes	Fig 7	no	no	yes	no	no
Tu L	412	Fronteirs in Physiology	10.3389/fphys.2017.00412	no		yes	yes	no	yes	yes	2	no		no	no	no	no		no	no	yes	yes	yes	yes	no unpaired tests		yes	no	yes	no
McGawley K	413	Fronteirs in Physiology	10.3389/fphys.2017.00413	no		yes	yes	no	yes	yes	2	no		no	no	sometimes	no		no	no	yes	yes	yes	yes	no	no	yes	no	yes	yes
Farrell E	414	Fronteirs in Physiology	10.3389/fphys.2017.00414	no		yes	sometimes	no	no	yes	2	no		no	no	sometimes	no		no	no	yes	yes	yes	no	yes	yes	yes	no	yes	sometimes
Haahr T	415	Fronteirs in Physiology	10.3389/fphys.2017.00415	yes	case report
Bibi Z	416	Fronteirs in Physiology	10.3389/fphys.2017.00416	no		no															no	no	no
Mersmann F	417	Fronteirs in Physiology	10.3389/fphys.2017.00417	no		yes	yes	no	no	no	2	no		yes	no	sometimes	no		yes	no	yes	no	no
Liu F	418	Fronteirs in Physiology	10.3389/fphys.2017.00418	no		no															yes	no	yes	no	no	no	yes	no	sometimes	no
Charlot K	419	Fronteirs in Physiology	10.3389/fphys.2017.00419	no		yes	yes	yes	yes	yes	2	no		no	no	sometimes	no		no	no	yes	no	no
Miles-Chan	420	Fronteirs in Physiology	10.3389/fphys.2017.00420	yes	review
Glynn D	422	Fronteirs in Physiology	10.3389/fphys.2017.00422	no		yes	no	no	no	yes	not specified	unknown		no	no	no	no		no		yes	yes	yes	no	yes	yes	yes	no	yes	no
Behm D	423	Fronteirs in Physiology	10.3389/fphys.2017.00423	yes	review
Gabe C	424	Fronteirs in Physiology	10.3389/fphys.2017.00424	no		no															no	no	no
Bartolak-Suki E	425	Fronteirs in Physiology	10.3389/fphys.2017.00425	no		yes	yes	no	yes	yes	2	no		no	no	sometimes	no		no	no	yes	no	no
Schultz M	426	Fronteirs in Physiology	10.3389/fphys.2017.00426	no		yes	yes	no	yes	yes	2	no		no	no	sometimes	no		yes	no	yes	no	no
Morales A	427	Fronteirs in Physiology	10.3389/fphys.2017.00427	no		yes	yes	no	no	yes	1	yes	Table 3	no	no	no	no		no	no	yes	yes	yes	no	yes	yes	yes	no	yes	no
Scialo F	428	Fronteirs in Physiology	10.3389/fphys.2017.00428	yes	review
Li Y	429	Fronteirs in Physiology	10.3389/fphys.2017.00429	yes	review
Ye L	430	Fronteirs in Physiology	10.3389/fphys.2017.00430	yes	review
Aromolaran A	431	Fronteirs in Physiology	10.3389/fphys.2017.00431	yes	review
Sweeting A	432	Fronteirs in Physiology	10.3389/fphys.2017.00432	yes	review
Fletcher J	433	Fronteirs in Physiology	10.3389/fphys.2017.00433	yes	review
Xia Z	434	Fronteirs in Physiology	10.3389/fphys.2017.00434	yes	review
Smith C	435	Fronteirs in Physiology	10.3389/fphys.2017.00435	yes	review
Pierrel F	436	Fronteirs in Physiology	10.3389/fphys.2017.00436	yes	review
Velayo C	437	Fronteirs in Physiology	10.3389/fphys.2017.00437	no		no															yes	no	yes	yes	no	no	yes	no	yes	sometimes
Khan N	438	Fronteirs in Physiology	10.3389/fphys.2017.00438	no		yes	no	no	no	yes	1	yes	Fig 1c	no	no	no	no		no	no	yes	no	no
Liu C	439	Fronteirs in Physiology	10.3389/fphys.2017.00439	yes	review
Lima M	440	Fronteirs in Physiology	10.3389/fphys.2017.00440	no		yes	no	no	no	yes	not specified	unknown		no	no	no	no		no		yes	no	no
Piatti F	441	Fronteirs in Physiology	10.3389/fphys.2017.00441	no		no															no	no	no
Tan S	442	Fronteirs in Physiology	10.3389/fphys.2017.00442	yes	perspective
Faltinova A	443	Fronteirs in Physiology	10.3389/fphys.2017.00443	no		no															no	no	no
Alvarez C	444	Fronteirs in Physiology	10.3389/fphys.2017.00444	no		yes	yes	no	yes	yes	2	no		no	no	sometimes	no		no	no	yes	no	no
Zhang L	446	Fronteirs in Physiology	10.3389/fphys.2017.00446	no		yes	sometimes	no	no	yes	2	yes	Fig 1b-e	yes	yes	no	yes	Fig 8c	no	no	yes	no	no
Qui F	449	Fronteirs in Physiology	10.3389/fphys.2017.00449	no		yes	no	no	no	no	1	no		no	no	no	no		no	no	yes	no	no
Yamazaki H	450	Fronteirs in Physiology	10.3389/fphys.2017.00450	no		no															yes	no	yes	yes	no	no	yes	no	yes	no
da Silva	452	Fronteirs in Physiology	10.3389/fphys.2017.00452	no		yes	no	no	yes	yes	2	no		no	no	sometimes	no		no	no	yes	no	no
Gando	454	Fronteirs in Physiology	10.3389/fphys.2017.00454	no		yes	yes	no	no	yes	1	yes	Table 1	no	no	no	yes	Table 1	no	no	yes	yes	yes	yes	no unpaired tests		yes	no	yes	no
Yang J	455	Fronteirs in Physiology	10.3389/fphys.2017.00455	no		yes	no	no	no	no	1	no		no	no	no	no		no	no	yes	yes	yes	no	yes	yes	yes	no	yes	no
Martinez-Lemus	456	Fronteirs in Physiology	10.3389/fphys.2017.00456	no		yes	no	no	no	yes	not specified	unknown		no	no	sometimes	yes	Fig 4	no	no	yes	yes	yes	no	no	no	yes	no	no	sometimes
Rajan T	457	Fronteirs in Physiology	10.3389/fphys.2017.00457	yes	review
Fernandez I	458	Fronteirs in Physiology	10.3389/fphys.2017.00458	no		yes	sometimes	no	no	yes	1	no		no	no	no	no		no	no	yes	no	no
Van Wepern	459	Fronteirs in Physiology	10.3389/fphys.2017.00459	yes	editorial
Camara A	460	Fronteirs in Physiology	10.3389/fphys.2017.00460	yes	review
Morton J	465	Fronteirs in Physiology	10.3389/fphys.2017.00465	no		yes	yes	no	no	yes	2	no		no	no	sometimes	yes	Fig 2?	no	no	yes	yes	yes	no	sometimes	sometimes	yes	no	yes	no

## Sheet: Variable list
Variable	Description
First_Author	first author name
first_page	first page of article
Journal	journal where article was published
DOI	article DOI
Excluded	yes if the article was excluded (not original research), no if the article was included
Exclude Reason	reason for exclusion
includes_ANOVA	yes if the paper includes ANOVA, no otherwise
ANOVA_names_factors	yes if the article names all factor for all ANOVAs in the paper, sometimes if factors named for some ANOVAs but not others, no if factors are not named for any ANOVA
specifies_BTW_WIN_Ss_fact	yes if the article specifies between and within-subjects factors for all ANOVAs in the paper, sometimes if specified for some ANOVAs but not others, no if between and within subjects factors are not specified for any ANOVA
RM_ANOVA	yes if the paper includes repeated measures ANOVA, no otherwise
ANOVA_posthoc_specified	yes if post-hoc tests are specified for all ANOVAs, no if post-hoc tests are not specified
ANOVA_max_n_factors	not specified if the number of factors is not stated for any ANOVA, 1 if a maximum of 1 factor is used, 2 if a maximum of 2 factors are used, 3+ of >2 factors are used
Oneway_instead_of_multiway	yes if there data were analyzed by a one way ANOVA when the study design included two or more factors, no if the abstractors did not find evidence of this error, unknown if the number of factors was not specified for any ANOVA in the paper; exclude if the maximum number of factors reported was one however the paper contained ANOVAs for which the number of factors was not specified
Oneway_Fig_table	figure, table or variable where abstractors identified the error above
ANOVA_Report_Fstat	yes if the F-statistic is reported for all ANOVAS, sometimes if reported for some ANOVAs, no if not reported for any ANOVAs
ANOVA_Report _DF	yes if the DF are reported for all ANOVAS, sometimes if reported for some ANOVAs, no if not reported for any ANOVAs
ANOVA_Report_p	yes if exact p-values are reported for all ANOVAS, sometimes if reported for some ANOVAs, no if not reported for any ANOVAs
RMANOVA_needed_not_reported	yes if data appear to require a repeated measures ANOVA, but the authors only mentioned using ANOVA without stating the repeated measures were used; no otherwise
RM_Needed_fig_table	figure, table or variable where abstractors identified the error above
complex_ANOVA	yes if the paper included a complex ANOVA (fixed and random factors, mixed model, etc.), no otherwise
n_factor_not_reported_for_all	no if the number of factors was reported for all ANOVAs, not for RM ANOVA if the number of factors was not specified for RM ANOVAs
include_ ANOVA_or_ttest	yes if the paper includes ANOVA or t-test, no otherwise
includes_ANOVA_and_ttest	yes if the paper includes ANOVA and t-test, no otherwise
includes_ttest	yes if the paper includes a t-test, no otherwise
specified_paired_unpaired_ttest	yes if the paper specifies whether all t-tests were paired or unpaired; sometimes if this information was specified for some t-tests but not others, no if paired vs. unpaired was not specified or any t-tests
specifies_equ_unequ_var	yes if the paper specifies whether all unpaired t-tests assumed equal or unequal variance; sometimes if this information was specified for some t-tests but not others, no if paired vs. unpaired was not specified or any t-tests; no unpaired test if only paired t-tests were used
specified_students	yes if the paper specified that a student's t-test was used, no otherwise (only completed for papers that did not otherwise specify whether paired or unpaired t-tests were used)
identify_data_analyzed_by_t-test	yes if the abstractors could clearly identify at least one variable analyzed by t-test or a two group comparison; no otherwise
reports_t_statistic	yes if the t-statistic is reported for all t-tests, sometimes if reported for some t-tests, no if not reported for any t-tests
ttest_DF_or_n	yes if the DF or n were reported for all t-tests, sometimes if reported for some t-tests, no if not reported for any t-tests
ttest_exact_p	yes if exact p-values were reported for all t-tests, sometimes if reported for some t-tests, no if not reported for any t-tests
